# Supplementary material
Source: Springer Nature journal article supplement (https://www.springermedizin.de/resource/supplementary/12943_2010_760_MOESM1_ESM.pdf/9554756)

**A**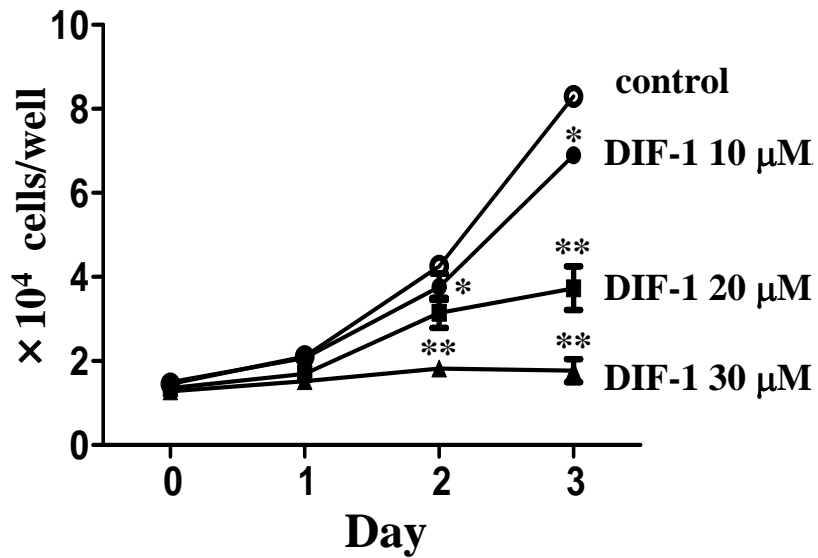**B**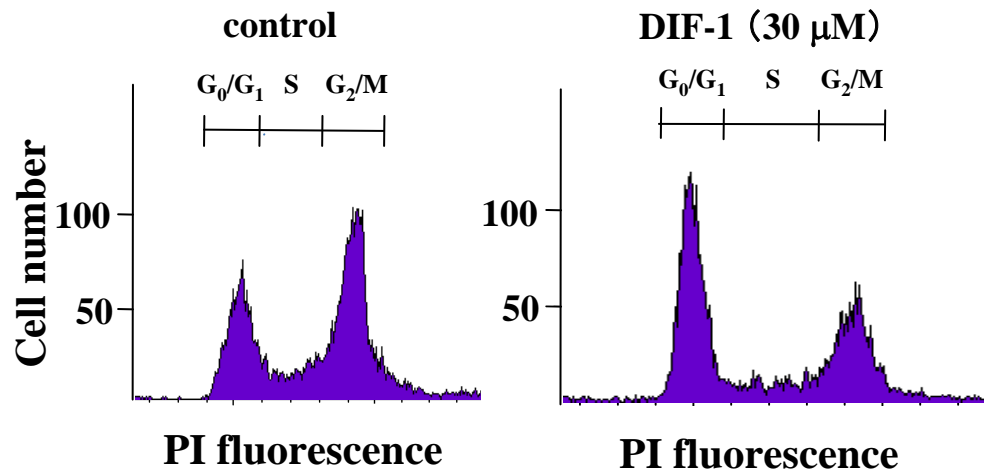

|                                    |            |               |
|------------------------------------|------------|---------------|
| G <sub>0</sub> /G <sub>1</sub> (%) | 30.9 ± 2.3 | 68.6 ± 2.9 ** |
| S (%)                              | 16.3 ± 1.5 | 8.7 ± 0.6 *   |
| G <sub>2</sub> /M (%)              | 52.8 ± 3.4 | 22.7 ± 2.3 *  |

Supplement: MOESM1 [file 9554756]
